CORRECTION

# Correction: A Novel Quantitative Hemolytic Assay Coupled with Restriction Fragment Length Polymorphisms Analysis Enabled Early Diagnosis of Atypical Hemolytic Uremic Syndrome and Identified Unique Predisposing Mutations in Japan

Yoko Yoshida, Toshiyuki Miyata, Masanori Matsumoto, Hiroko Shirotani-Ikejima, Yumiko Uchida, Yoshifumi Ohyama, Tetsuro Kokubo, Yoshihiro Fujimura

There are two errors in the “Hemolytic assay using citrated human plasma and sheep RBCs” section of the Materials and Methods. The fourth sentence of the second paragraph should read: After incubation, the reaction was quenched by the addition of 1 ml of VBS-EDTA buffer (2.5 mM barbital, 1.5 mM sodium barbital and 144 mM NaCl, and 2 mM EDTA, pH 7.4).

The sixth sentence of the second paragraph should read: Plasma, diluted with AP-CFTD buffer containing 50 mM EDTA was treated in the same manner and used as a blank.

## Reference

1. Yoshida Y, Miyata T, Matsumoto M, Shirotani-Ikejima H, Uchida Y, Ohyama Y, et al. (2015) A Novel Quantitative Hemolytic Assay Coupled with Restriction Fragment Length Polymorphisms Analysis Enabled Early Diagnosis of Atypical Hemolytic Uremic Syndrome and Identified Unique Predisposing Mutations in Japan. PLoS ONE 10(5): e0124655. doi:[10.1371/journal.pone.0124655](https://doi.org/10.1371/journal.pone.0124655) PMID: [25951460](https://pubmed.ncbi.nlm.nih.gov/25951460/)

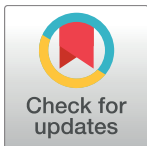

## OPEN ACCESS

**Citation:** Yoshida Y, Miyata T, Matsumoto M, Shirotani-Ikejima H, Uchida Y, Ohyama Y, et al. (2017) Correction: A Novel Quantitative Hemolytic Assay Coupled with Restriction Fragment Length Polymorphisms Analysis Enabled Early Diagnosis of Atypical Hemolytic Uremic Syndrome and Identified Unique Predisposing Mutations in Japan. PLoS ONE 12(5): e0178015. <https://doi.org/10.1371/journal.pone.0178015>

**Published:** May 16, 2017

**Copyright:** © 2017 Yoshida et al. This is an open access article distributed under the terms of the [Creative Commons Attribution License](https://creativecommons.org/licenses/by/4.0/), which permits unrestricted use, distribution, and reproduction in any medium, provided the original author and source are credited.
